# Supplementary material
Source: HighWire-hosted journal article supplement (https://gut.bmj.com/content/gutjnl-2019-318912)
Supplement: inline-supplementary-material-3 [file inline-supplementary-material-3.xlsx]

## Sheet: Sheet1
	Age (year)	Gender	Tumor size (cm)	Tumor location	Differentiation	TMN staging	Pathological grading	MVI grading	Barcelona classification	ALT (U/L)	AST (U/L)	AFP (ng/mL)	HBsAg	HBeAg	HBeAb	HBcAb	HBV DNA (IU/mL)
HCC1	68	Male	5*4	S5	moderate	T1bN0M0	II	M2	A	27	33	2.3	+	-	+	+	Undetectable
HCC2	62	Male	1*1	S2	moderate	T1aN0M0	II	M0	A	28	25	31.9	+	-	+	+	Undetectable
HCC3	53	Male	2*1	S6	moderate	T1aN0M0	III	M0	A	24	31	285.6	+	-	+	+	Undetectable
HCC5	57	Female	4*3	S5	moderate	T1bN0M0	II	M0	A	28	26	408.7	+	-	+	+	1.04*10E5
HCC6	56	Male	3*3	S8	moderate-low	T1bN0M0	III	M1	A	46	36	7.8	+	-	+	+	1.14*10E2
HCC7	39	Male	9*6	S6	moderate	T1bN0M0	II	M0	A	46	37	279.9	+	+	-	+	3.77*10E5
HCC8	73	Male	11*10	S5/7/8	moderate-low	T4N0M0	III	M1	A	-	-	627.2	-	-	+	+	Undetectable
HCC10	68	Male	8*7	S7	moderate	T1bN0M0	II	M0	A	17	24	1.1	-	-	+	+	Undetectable
HCC11	53	Male	5*4	S6	moderate	T1bN0M0	II	M0	A	24	25	2.8	+	-	-	+	Undetectable
HCC12	67	Male	2*1	S1	moderate-low	T1aN0M0	III	M0	A	26	29	476.5	+	-	+	+	Undetectable
HCC13	52	Female	3*2	S5/8	moderate-low	T1bN0M0	III	M0	A	28	51	233.9	-	-	-	-	Undetectable
HCC14	48	Male	2*2	S4a	low	T1bN0M0	IV	-	A	24	23	2.9	+	-	-	+	2.55*10E3
HCC15	47	Female	4*2	S5/6	moderate-low	T4N0M0	III	M1	A	24	37	5.3	+	-	-	+	Undetectable
HCC16	71	Male	9*8	S2	moderate	T1bN0M0	II	M0	A	57	83	2.2	+	-	+	+	2.76*10E4
HCC17	48	Male	5*5	S5/8	moderate	T1bN0M0	II	M0	A	32	28	23390.5	+	-	-	+	3.58*10E1
HCC18	61	Male	2*2	S7	moderate-low	T1bN0M0	II-III	M0	A	12	23	4650.1	+	-	-	+	Undetectable
HCC19	74	Male	5*4	S8	moderate	T1bN0M0	II	M0	A	21	23	1.7	+	-	-	+	1.51*10E3
HCC21	43	Male	4*2	S8	moderate	T1bN0M0	II	M0	A	30	26	3.8	+	-	-	+	Undetectable
HCC22	64	Male	3*2	S6/7	moderate	T1bN0M0	II	M0	A	19	25	1001.5	+	-	+	+	Undetectable
HCC24	54	Male	10*9	S4/8	moderate	T1bN0M0	II	M2	A	17	37	791.6	-	-	-	+	-
HCC25	57	Male	2*2	S3	moderate	T1bN0M0	II	M0	A	57	28	829.7	+	-	-	+	2.05*10E3
HCC26	61	Male	2*2	S5	moderate	T1bN0M1	II	M0	A	25	36	33	+	-	-	+	3.96*10E6
HCC27	60	Male	6*5	S7	moderate	T1bN0M0	II	M0	A	39	33	12.4	+	-	+	+	3.80*10E3
HCC29	57	Male	2*2	S2	moderate	T1bN0M0	II	M0	A	75	51	4.2	+	-	+	+	1.62*10E3
HCC30	79	Male	3*2	S5/6	moderate-high	T1bN0M0	II	M0	A	10	19	152.8	-	-	+	+	Undetectable
HCC31	54	Male	3*2	S3	moderate	T1bN0M0	II	M1	A	9	19	233.8	+	-	-	+	Undetectable
HCC32	56	Male	14*9	S2/3	moderate-low	T1bNxM0	II-III	M2	A	38	49	294.4	+	-	-	+	7.59*10E4
HCC33	59	Male	14*8	S2/3	moderate	T4N0M0	II	M2	A	23	61	38634.1	+	-	-	+	1.90*10E3
HCC34	60	Male	4*4	S4a	moderate	T1bN0M0	II	M1	A	39	34	826.3	+	-	+	+	5.65*10E5
HCC36	84	Male	5*4	S6	moderate	T1bN0M0	II	M0	A	20	27	10.5	-	-	-	+	-
